# Supplementary material
Source: MDPI journal article supplement (https://www.mdpi.com/1424-2818/15/12/1179)
Supplement: s1 [file s1]

# ***Acinetobacter thutiue* sp. nov. isolated from oil-contaminated soil in motorbike repair workshops**

Nhan Le Thi Tuyet, Jaisoo Kim\*

Department of Life Science, College of Natural Sciences, Kyonggi University, Suwon, Kyonggi-Do  
16227, Republic of Korea

Running title: *Acinetobacter thutiue* sp. nov.

\*Corresponding author: Jaisoo Kim.

Tel: +82-31-249-9648; Fax: +82-31-249-9604

Email: jkimtamu@kgu.ac.kr

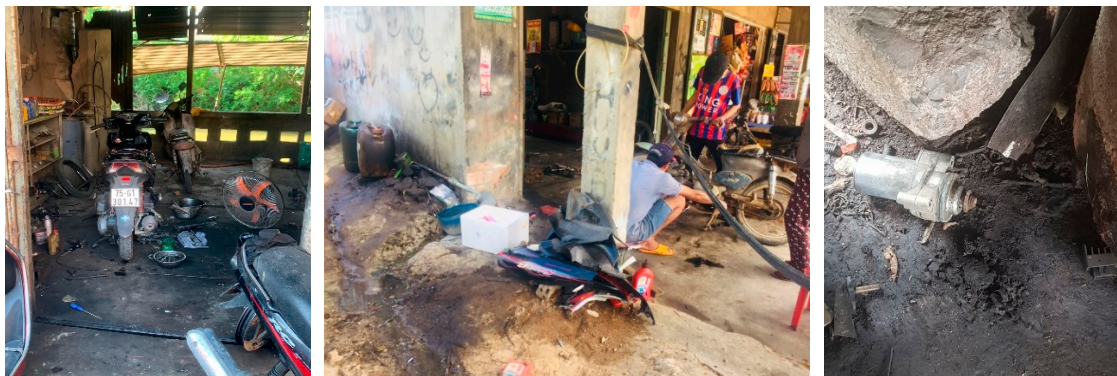

**Figure S1.** Sampling sites at the automobile workshops.

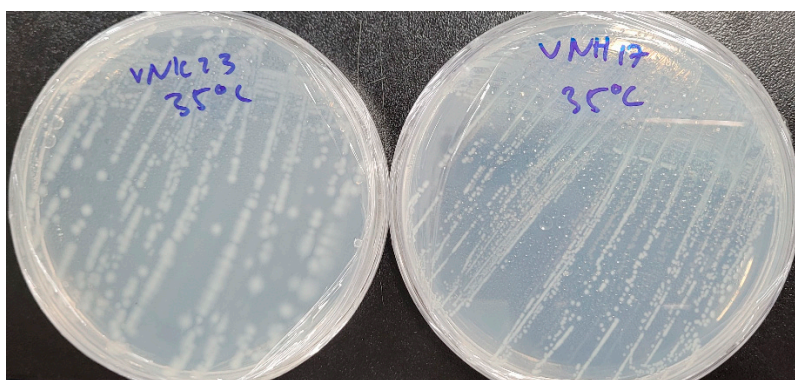

**Figure S2.** Colonies of *A. thutiue* VNH17<sup>T</sup> and *A. thutiue* VNK23 were grown on R2A at 35°C for 48 h.

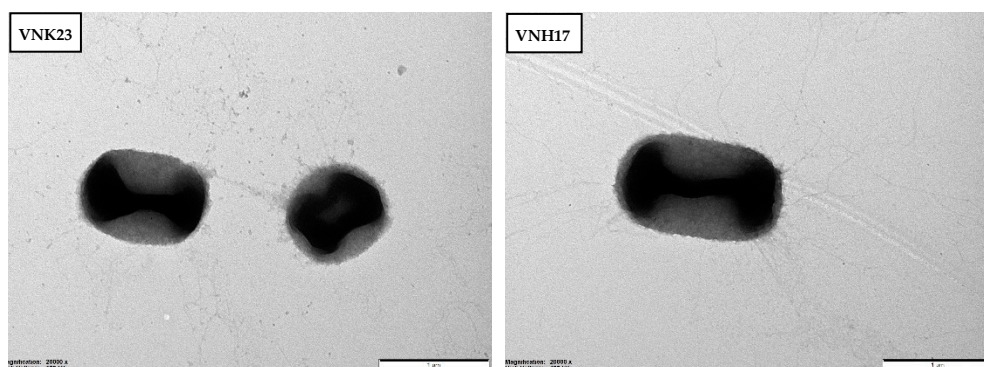

**Figure S3.** Transmission electron microscopy of the *A. thutiue* VNH17<sup>T</sup> and *A. thutiue* VNK23 strains grown on R2A medium plates for 2 days at 30°C and Bar 1 μm.

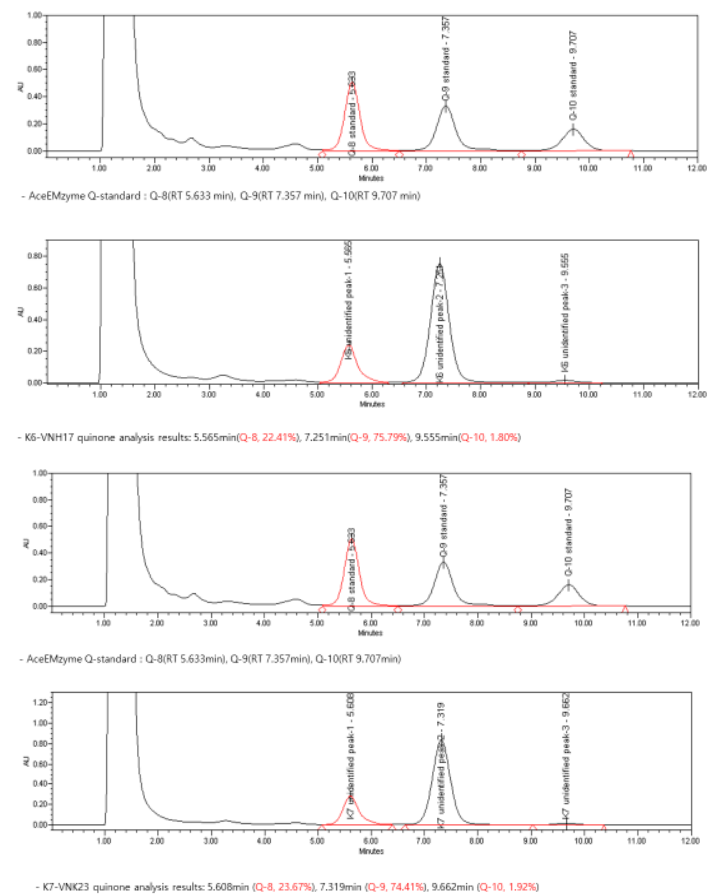

**Figure S4.** Quinone analysis results of the *A. thutiae* VNH17<sup>T</sup> and *A. thutiae* VNK23 strains.

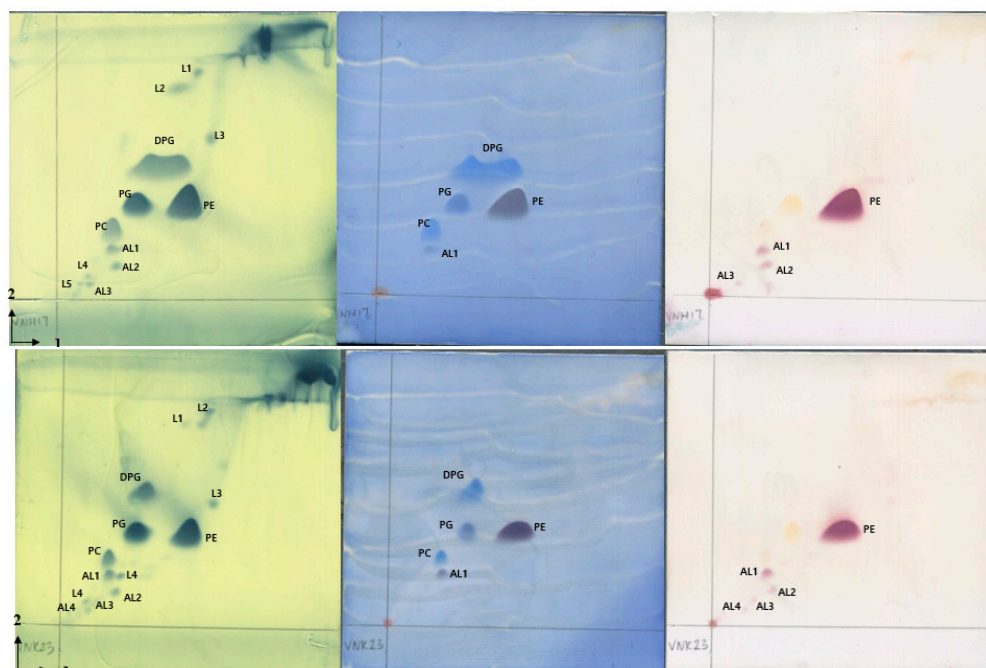

**Figure S5.** Polar lipid profile of the *A. thutiae* VNH17<sup>T</sup> and *A. thutiae* VNK23 strains  
PG - phosphatidylglycerol; DPG - diphosphatidylglycerol; PE - phosphatidylethanolamine; PC – phodphatidylcholine, AL1-4 – unidentified aminolipid, L1-5 – unidentified polar lipids

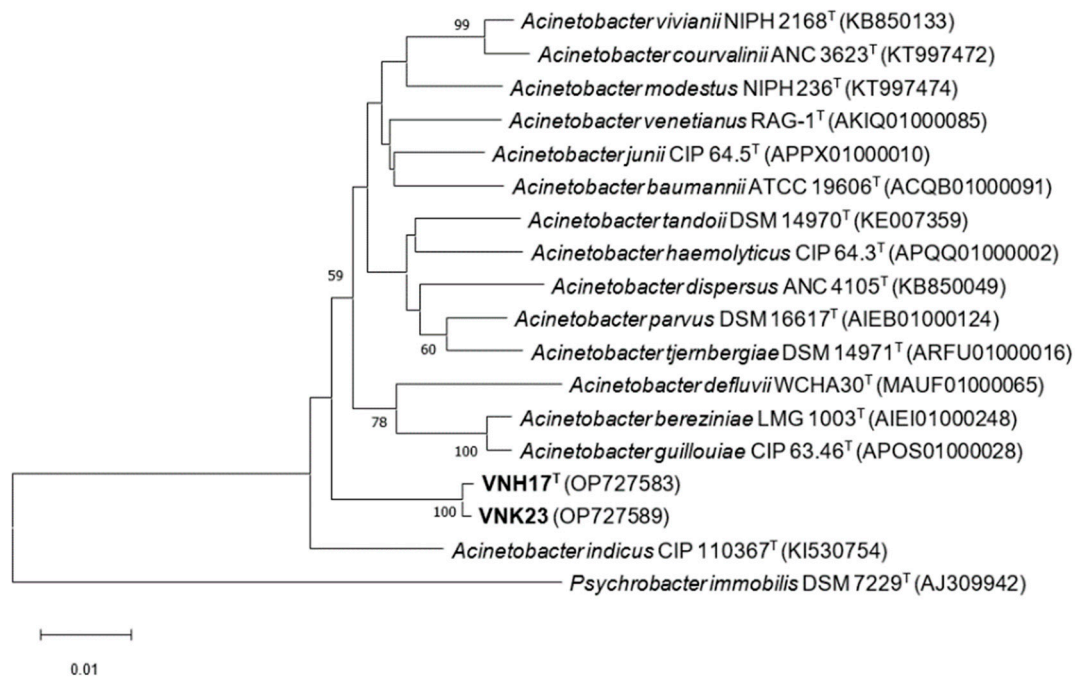

**Figure S6.** The phylogenetic tree was reconstructed with the neighbor-joining method based on 16S rRNA gene sequences of VNH17<sup>T</sup>, VNK23, and the type strains of the genus *Acinetobacter*. *Moraxella lacunata* NCTC 7911<sup>T</sup> was used as an outgroup. Numbers at branch nodes represent confidence levels (values > 50% are shown) from 1000 replicate bootstrap samplings. GenBank accession numbers are shown in parentheses. Bar, 0.01 substitutions per nucleotide position.

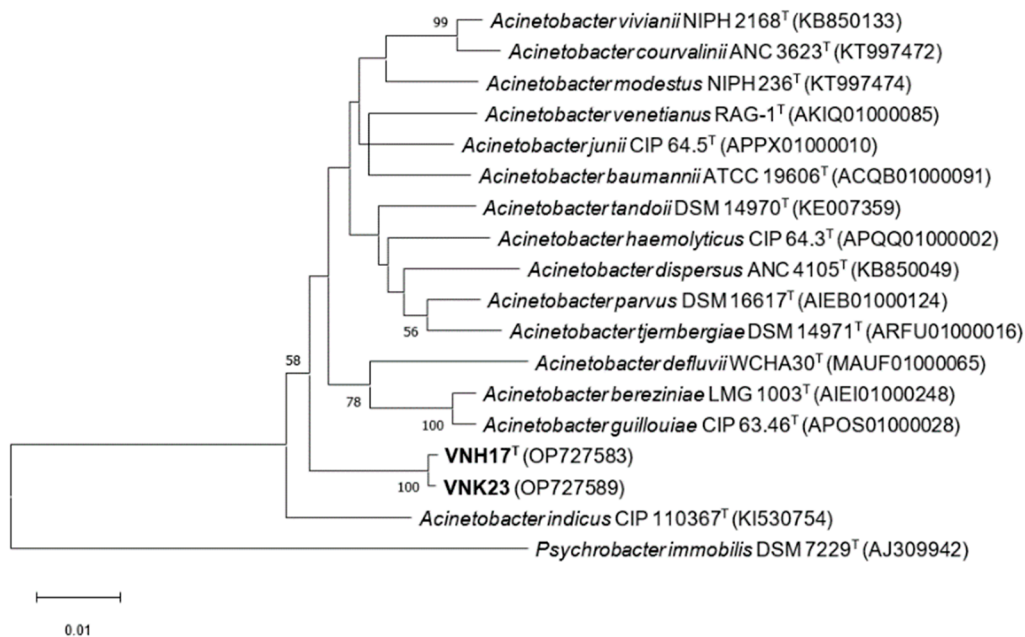

**Figure S7.** Phylogenetic tree reconstructed with the minimum evolution method based on 16S rRNA gene sequences of the two isolates and type strains of the genus *Acinetobacter*. *Psychrobacter immobilis* DSM 7229<sup>T</sup> was used as an outgroup. Numbers at branch nodes represent confidence levels (values > 50% are shown) from 1000 replicate bootstrap samplings. GenBank accession numbers are given in parentheses. Bar, 0.01 substitutions per nucleotide position. Evolutionary analyses were conducted in MEGA 11.

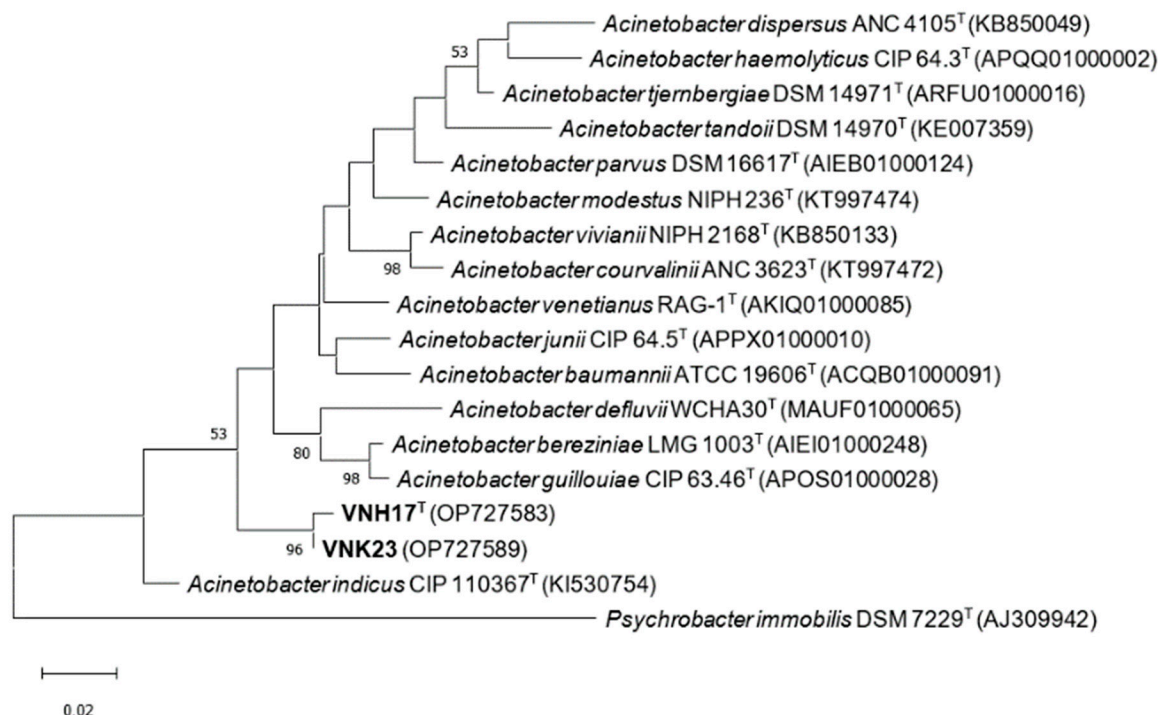

**Figure S8.** Phylogenetic tree reconstructed with the maximum likelihood method based on 16S rRNA gene sequences of the two isolates and type strains of the genus *Acinetobacter*. *Psychrobacter immobilis* DSM 7229<sup>T</sup> was used as an outgroup. Numbers at branch nodes represent confidence levels (values >50% are shown) from 1000 replicate bootstrap samplings. GenBank accession numbers are given in parentheses. Bar, 0.02 substitution per nucleotide position. Evolutionary analyses were conducted in MEGA 11.

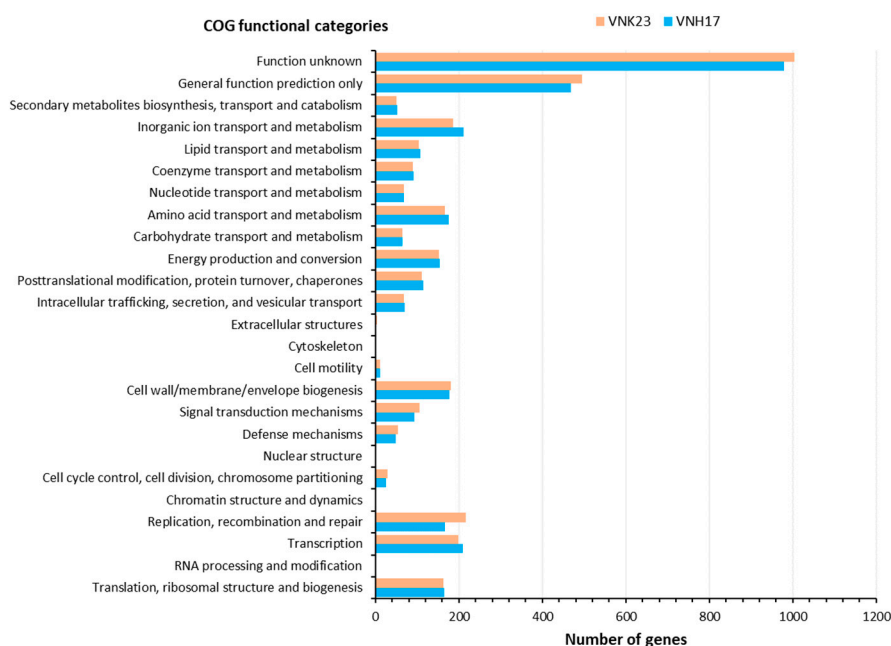

**Figure S9.** COG functional classification of proteins in the *A. thutiae* VNH17<sup>T</sup> and *A. thutiae* VNK23 genome.

**Table S1.** Zone diameter breakpoint (mm) of antimicrobial agents for *Acinetobacter thutiae* VNH17<sup>T</sup> and VNK23.

| Strain             | Piperacillin | Ampicillin – sulbactam | Gentamicin | Tetracycline | Levofloxacin |
|--------------------|--------------|------------------------|------------|--------------|--------------|
| VNH17 <sup>T</sup> | 13-15 (R)    | ≥ 23 (S)               | 13-14 (I)  | 25-27 (S)    | ≥ 28 (S)     |
| VNK23              | ≥ 21 (S)     | 35 (S)                 | ≥ 17 (S)   | ≥ 31 (S)     | ≥ 28 (S)     |

Susceptibility categories (S, susceptible; I, intermediate; R, resistant) according to the Clinical and Laboratory Standards Institute (CLSI) are shown.

**Table S2.** Results from the API ZYM, API 20NE test. (1) VNH17<sup>T</sup>; (2) VNK23; (3) *Acinetobacter parvus* KACC 12455; (4) *Acinetobacter junii* KACC12228; (5) *Acinetobacter tandoii* KACC 12229; (6) *Acinetobacter indicus* KCTC 42000; (7) *Acinetobacter bereziniae* KCTC 42001; (8) *Acinetobacter venetianus* DSM23050. Data are from the present study. +, positive; -, negative, +/-, weak positive or ambiguous.

| Characteristics                     | 1   | 2   | 3   | 4 | 5   | 6   | 7   | 8   |
|-------------------------------------|-----|-----|-----|---|-----|-----|-----|-----|
| <b>Enzymatic reaction (API ZYM)</b> |     |     |     |   |     |     |     |     |
| Alkaline phosphate                  | -   | -   | -   | + | +   | +   | +   | +   |
| Esterase                            | +   | +   | +   | + | +/- | +   | +   | +   |
| Esterase lipase (C8)                | +   | +   | +   | + | +   | +   | +   | +   |
| Lipase (C14)                        | +   | +   | -   | - | +   | +/- | +   | +   |
| Leucine arylamidase                 | +   | +   | +   | + | +   | +   | +   | +   |
| Valine arylamidase                  | +   | +   | +/- | + | +   | +   | +   | +   |
| Crystine arylamidase                | +/- | +/- | -   | - | +   | +   | +   | +   |
| Trypsin                             | -   | -   | -   | - | -   | -   | -   | -   |
| Alpha chymotrypsin                  | -   | -   | -   | - | -   | -   | -   | -   |
| Acid phosphatase                    | +   | +   | +   | + | +   | +/- | +   | +/- |
| Naphthol-AS-BI- phosphate           | +   | +   | +   | + | +   | +   | +   | +   |
| Alpha galactosidase                 | -   | -   | -   | - | -   | -   | -   | -   |
| Beta galactosidase                  | -   | -   | -   | - | -   | -   | -   | -   |
| Beta glucuronidase                  | -   | -   | -   | - | -   | -   | -   | -   |
| Alpha glucosidase                   | -   | -   | -   | - | -   | -   | +/- | -   |
| Beta glucosidase                    | -   | -   | -   | - | -   | -   | -   | -   |
| N-acetyl beta glucosaminidase       | -   | -   | -   | - | -   | -   | -   | -   |
| Alpha monosidase                    | -   | -   | -   | - | -   | -   | -   | -   |
| Alpha fucosidase                    | -   | -   | -   | - | -   | -   | -   | -   |
| <b>API 20NE</b>                     |     |     |     |   |     |     |     |     |
| Nitrate reduction                   | -   | -   | -   | - | -   | -   | -   | -   |
| Indole production                   | -   | -   | -   | - | -   | -   | -   | -   |
| Glucose fermentation                | -   | -   | -   | - | -   | -   | +/- | -   |
| Arginine dihydrolase                | +   | +   | +   | + | +   | +   | +   | +   |
| Urease                              | +   | +   | +   | + | +   | +   | +   | +   |
| Aesculin hydrolysis                 | -   | -   | -   | - | -   | +   | +   | -   |
| Gelatin hydrolysis                  | -   | -   | -   | - | -   | -   | -   | +/- |
| β - Galactosidase                   | -   | -   | -   | - | -   | +   | -   | -   |
| <b>Assimilation of</b>              |     |     |     |   |     |     |     |     |
| D-Glucose                           | -   | -   | -   | - | -   | -   | -   | -   |
| L-Arabinose                         | -   | -   | -   | - | -   | -   | -   | -   |
| D-Mannose                           | -   | -   | -   | - | -   | +   | -   | -   |
| D-Mannitol                          | -   | -   | -   | - | -   | -   | +   | -   |

| Characteristics           | 1                     | 2                     | 3                        | 4                        | 5                | 6                               | 7           | 8        |
|---------------------------|-----------------------|-----------------------|--------------------------|--------------------------|------------------|---------------------------------|-------------|----------|
| N-Acetyl-glucosamine      | -                     | -                     | -                        | -                        | -                | +                               | -           | -        |
| D-Maltose                 | -                     | -                     | -                        | -                        | -                | +                               | +           | -        |
| Potassium gluconate       | -                     | -                     | -                        | -                        | -                | -                               | +           | -        |
| Capric acid               | +                     | +                     | +                        | +                        | +                | +/-                             | +           | +        |
| Adipic acid               | -                     | -                     | -                        | -                        | -                | -                               | +           | -        |
| Malate                    | -                     | -                     | -                        | +                        | +                | +                               | +           | +        |
| Trisodium citrate         | +                     | +                     | -                        | +                        | -                | -                               | +           | +        |
| Phenylacetic acid         | -                     | -                     | -                        | -                        | +                | +                               | -           | -        |
| <b>API 32</b>             |                       |                       |                          |                          |                  |                                 |             |          |
| L-Rhamnose                | -                     | -                     | -                        | -                        | -                | -                               | -           | -        |
| N-Acetyl-glucosamine      | -                     | -                     | -                        | -                        | -                | -                               | -           | -        |
| D-Ribose                  | -                     | -                     | -                        | -                        | -                | -                               | -           | -        |
| Inositol                  | -                     | -                     | -                        | -                        | -                | -                               | -           | -        |
| D-Saccharose (sucrose)    | -                     | -                     | -                        | -                        | -                | -                               | -           | -        |
| D-Maltose                 | -                     | -                     | -                        | -                        | -                | -                               | -           | -        |
| Itaconic acid             | -                     | -                     | -                        | -                        | -                | -                               | -           | -        |
| Suberic acid              | -                     | -                     | -                        | -                        | -                | -                               | +           | -        |
| Sodium malonate           | -                     | -                     | -                        | -                        | +                | -                               | -           | +        |
| Sodium acetate            | +                     | +                     | +                        | +                        | +                | +                               | +           | +        |
| Lactic acid               | -                     | -                     | -                        | -                        | +                | +                               | +           | -        |
| L-Alanine                 | +/-                   | -                     | -                        | -                        | +                | +                               | +           | +        |
| Potassium 5-ketogluconate | -                     | -                     | -                        | -                        | -                | -                               | -           | -        |
| Glycogen                  | -                     | -                     | -                        | -                        | -                | -                               | -           | -        |
| 3-Hydroxybenzoic acid     | -                     | -                     | -                        | -                        | -                | -                               | -           | -        |
| L-Serine                  | -                     | -                     | -                        | -                        | -                | -                               | -           | -        |
| D-Mannitol                | -                     | -                     | -                        | -                        | -                | -                               | +/-         | -        |
| D-Glucose                 | -                     | -                     | -                        | -                        | -                | -                               | -           | -        |
| Salicin                   | -                     | -                     | -                        | -                        | -                | -                               | -           | -        |
| D-Melibiose               | -                     | -                     | -                        | -                        | -                | -                               | -           | -        |
| D-Sorbitol                | -                     | -                     | -                        | -                        | -                | -                               | +           | -        |
| L-Arabinose               | -                     | -                     | -                        | -                        | -                | -                               | -           | -        |
| Propionic acid            | +                     | +                     | -                        | +                        | +                | +                               | +           | +        |
| Capric acid               | +                     | +                     | +                        | +                        | +                | +                               | +           | +        |
| Valeric acid              | +                     | +                     | +                        | +                        | +                | +                               | +           | +        |
| Trisodium citrate         | +                     | +                     | -                        | +                        | -                | -                               | +           | +        |
| L-Histidine               | -                     | -                     | -                        | +                        | +                | -                               | +           | +        |
| Potassium 2-ketogluconate | -                     | -                     | -                        | -                        | -                | -                               | -           | -        |
| 3-Hydroxybutyric acid     | -                     | -                     | -                        | -                        | +                | +/-                             | +           | +        |
| 4-Hydroxybenzoic acid     | -                     | -                     | -                        | -                        | +                | -                               | +           | -        |
| L-Proline                 | +                     | +                     | -                        | +                        | +                | -                               | +           | +        |
| Source of isolation       | oil-contaminated soil | oil-contaminated soil | human clinical specimens | human clinical specimens | activated sludge | hexachlorocyclohexane dump site | human wound | seawater |
| DNA G+C content (mol%)    | 42.1                  | 41.8                  | 41.8                     | 42                       | 40               | 40.4                            | 38.2        | 43.9     |

**Table S3.** ANIb and dDDH values (%) between the genome sequences of the two isolates and other *Acinetobacter* species with validly published names.

| No. | Taxon name                   | Strain name                  | Genome accession no. | ANIb               | dDDH  | ANIb  | dDDH  |
|-----|------------------------------|------------------------------|----------------------|--------------------|-------|-------|-------|
|     |                              |                              |                      | VNH17 <sup>T</sup> |       | VNK23 |       |
| 1   | <i>A. albensis</i>           | ANC 4874 <sup>T</sup>        | FMBK00000000.1       | 75.05              | 20.30 | 74.12 | 20.30 |
| 2   | <i>A. amyesii</i>            | ANC 5579 <sup>T</sup>        | JAMCOU010000039.1    | 74.54              | 22.20 | 74.39 | 22.00 |
| 3   | <i>A. apis</i>               | ANC 5114 <sup>T</sup>        | FZLN00000000.1       | 72.19              | 20.20 | 72.32 | 20.40 |
| 4   | <i>A. barettiae</i>          | B10A <sup>T</sup>            | VTDM00000000.1       | 75.76              | 21.10 | 71.75 | 21.00 |
| 5   | <i>A. baumannii</i>          | ATCC 19606 <sup>T</sup>      | CP046654.1           | 75.76              | 20.60 | 75.86 | 20.70 |
| 6   | <i>A. baylyi</i>             | CIP 107474 <sup>T</sup>      | APPT00000000.1       | 74.80              | 20.80 | 74.81 | 20.90 |
| 7   | <i>A. beijerinckii</i>       | CIP 110307 <sup>T</sup>      | APQL00000000.1       | 80.30              | 22.90 | 80.27 | 23.20 |
| 8   | <i>A. bereziniae</i>         | CIP 70.12 <sup>T</sup>       | APQG00000000.1       | 74.24              | 21.50 | 74.43 | 21.90 |
| 9   | <i>A. bohemicus</i>          | ANC 3994 <sup>T</sup>        | APOH00000000.1       | 74.46              | 20.70 | 74.64 | 20.30 |
| 10  | <i>A. boissieri</i>          | ANC 4422 <sup>T</sup>        | FMYL00000000.1       | 72.02              | 20.70 | 71.85 | 21.50 |
| 11  | <i>A. bouvetii</i>           | JCM 18991 <sup>T</sup>       | AP024595.1           | 73.82              | 20.30 | 73.61 | 20.00 |
| 12  | <i>A. brisouii</i>           | ANC 4119 <sup>T</sup>        | APPR00000000.1       | 74.24              | 21.40 | 74.10 | 21.70 |
| 13  | <i>A. calcoaceticus</i>      | CIP 81.8 <sup>T</sup>        | APQI00000000.1       | 75.83              | 20.70 | 75.70 | 20.80 |
| 14  | <i>A. celticus</i>           | ANC 4603 <sup>T</sup>        | MBDL00000000.1       | 73.92              | 20.20 | 73.96 | 20.20 |
| 15  | <i>A. chengduensis</i>       | WCHAc060005 <sup>T</sup>     | RCHC00000000.1       | 73.95              | 20.70 | 73.92 | 20.30 |
| 16  | <i>A. chinensis</i>          | WCHAc010005 <sup>T</sup>     | CP032134.1           | 74.31              | 20.90 | 74.44 | 21.60 |
| 17  | <i>A. colistiniresistens</i> | NIPH 2036 <sup>T</sup>       | ATGK00000000.1       | 81.26              | 24.30 | 81.47 | 24.60 |
| 18  | <i>A. courvalinii</i>        | ANC 3623 <sup>T</sup>        | APSA00000000.1       | 81.40              | 24.10 | 81.37 | 24.00 |
| 19  | <i>A. cumulans</i>           | WCHAc060092 <sup>T</sup>     | CP035934.2           | 73.75              | 20.90 | 74.06 | 21.10 |
| 20  | <i>A. defluvii</i>           | WCHA30 <sup>T</sup>          | CP029397.2           | 74.44              | 21.60 | 74.59 | 21.70 |
| 21  | <i>A. dispersus</i>          | ANC 4105 <sup>T</sup>        | APRL00000000.1       | 81.24              | 24.10 | 81.30 | 24.30 |
| 22  | <i>A. equi</i>               | 114 <sup>T</sup>             | CP012808.1           | 74.37              | 20.40 | 74.41 | 20.40 |
| 23  | <i>A. gandensis</i>          | ANC 4275 <sup>T</sup>        | LZDS00000000.1       | 74.16              | 20.80 | 76.14 | 20.50 |
| 24  | <i>A. geminorum</i>          | J00019 <sup>T</sup>          | JABELE00000000.1     | 75.95              | 20.80 | 76.14 | 21.20 |
| 25  | <i>A. gernerii</i>           | CIP 107464 <sup>T</sup>      | APPN00000000.1       | 74.05              | 21.70 | 74.41 | 22.10 |
| 26  | <i>A. guerrae</i>            | AC1271 <sup>T</sup>          | LXGN00000000.1       | 75.86              | 21.60 | 75.48 | 21.20 |
| 27  | <i>A. guillouiae</i>         | CIP 63.46 <sup>T</sup>       | APOS00000000.1       | 74.72              | 21.70 | 74.28 | 21.30 |
| 28  | <i>A. gyllenbergii</i>       | CIP 110306 <sup>T</sup>      | ATGG00000000.1       | 81.18              | 24.00 | 81.37 | 24.30 |
| 29  | <i>A. haemolyticus</i>       | CIP 64.3 <sup>T</sup>        | APQQ00000000.1       | 79.61              | 22.70 | 79.61 | 22.60 |
| 30  | <i>A. halotolerans</i>       | JCM 31009 <sup>T</sup>       | SGIM00000000.1       | 79.95              | 22.80 | 80.10 | 22.80 |
| 31  | <i>A. harbinensis</i>        | HITLi7 <sup>T</sup>          | JXBK00000000.1       | 74.10              | 21.00 | 74.25 | 20.70 |
| 32  | <i>A. ihumii</i>             | Marseille-P8049 <sup>T</sup> | UYYC00000000.1       | 75.46              | 21.00 | 75.56 | 20.90 |
| 33  | <i>A. indicus</i>            | ANC 4215 <sup>T</sup>        | ATGH00000000.1       | 75.10              | 22.00 | 75.31 | 22.20 |
| 34  | <i>A. johnsonii</i>          | CIP 64.6 <sup>T</sup>        | APON00000000.1       | 74.05              | 21.10 | 74.08 | 20.90 |
| 35  | <i>A. junii</i>              | CIP 64.5 <sup>T</sup>        | APPX00000000.1       | 79.53              | 22.40 | 79.56 | 22.50 |
| 36  | <i>A. kanungonis</i>         | PS-1 <sup>T</sup>            | JAACKC00000000.1     | 75.20              | 21.30 | 74.97 | 21.20 |
| 37  | <i>A. kookii</i>             | ANC 4667 <sup>T</sup>        | FMYO00000000.1       | 74.70              | 20.30 | 74.91 | 20.30 |
| 38  | <i>A. lactucae</i>           | NRRLB-41902 <sup>T</sup>     | LRPE00000000.1       | 75.81              | 20.70 | 75.87 | 20.80 |
| 39  | <i>A. lanii</i>              | 185 <sup>T</sup>             | CP049916.1           | 73.85              | 21.40 | 73.82 | 21.20 |
| 40  | <i>A. larvae</i>             | BRTC-1 <sup>T</sup>          | CP016895.1           | 72.79              | 21.60 | 72.65 | 21.10 |
| 41  | <i>A. lwoffii</i>            | NIPH 512 <sup>T</sup>        | AYHO00000000.1       | 74.98              | 22.70 | 74.49 | 22.00 |
| 42  | <i>A. modestus</i>           | CCM 8639 <sup>T</sup>        | BMDV00000000.1       | 81.30              | 23.90 | 81.29 | 24.00 |

|    |                          |                          |                  |       |       |       |       |
|----|--------------------------|--------------------------|------------------|-------|-------|-------|-------|
| 43 | <i>A. nectaris</i>       | CIP 110549 <sup>T</sup>  | AYER00000000.1   | 72.56 | 21.20 | 72.50 | 21.50 |
| 44 | <i>A. nematophilus</i>   | A-IN1 <sup>T</sup>       | JAPKMY00000000.1 | 73.99 | 20.50 | 74.21 | 20.80 |
| 45 | <i>A. nosocomialis</i>   | NIPH 2119 <sup>T</sup>   | APOP00000000.1   | 75.71 | 20.70 | 75.59 | 20.40 |
| 46 | <i>A. parvus</i>         | CIP 108168 <sup>T</sup>  | APOM00000000.1   | 91.70 | 45.40 | 91.95 | 45.20 |
| 47 | <i>A. piscicola</i>      | LW15 <sup>T</sup>        | NIFO00000000.1   | 74.62 | 21.50 | 74.62 | 21.40 |
| 48 | <i>A. pittii</i>         | CIP 70.29 <sup>T</sup>   | APQP00000000.1   | 75.71 | 20.60 | 75.73 | 20.50 |
| 49 | <i>A. pollinis</i>       | SCC477 <sup>T</sup>      | VTDQ00000000.1   | 72.71 | 20.40 | 72.57 | 20.40 |
| 50 | <i>A. populi</i>         | PBJ7 <sup>T</sup>        | NEXX00000000.1   | 73.00 | 21.50 | 72.76 | 21.40 |
| 51 | <i>A. portensis</i>      | AC877 <sup>T</sup>       | LWRV00000000.1   | 74.54 | 20.90 | 74.56 | 21.60 |
| 52 | <i>A. pragensis</i>      | ANC 4149 <sup>T</sup>    | LUAW00000000.1   | 73.58 | 20.00 | 73.47 | 19.90 |
| 53 | <i>A. proteolyticus</i>  | NIPH 809 <sup>T</sup>    | APOI00000000.1   | 81.33 | 24.30 | 81.21 | 24.20 |
| 54 | <i>A. pseudolwoffii</i>  | ANC 5044 <sup>T</sup>    | PHRG00000000.1   | 74.39 | 21.00 | 74.67 | 21.40 |
| 55 | <i>A. puyangensis</i>    | ANC 4466 <sup>T</sup>    | OANT00000000.1   | 72.90 | 21.20 | 72.88 | 21.00 |
| 56 | <i>A. qingfengensis</i>  | CCUG 69710 <sup>T</sup>  | VXKN00000000.1   | 72.81 | 22.00 | 72.76 | 22.30 |
| 57 | <i>A. radioresistens</i> | CIP 103788 <sup>T</sup>  | APQF00000000.1   | 74.05 | 20.70 | 74.20 | 20.40 |
| 58 | <i>A. rathckeae</i>      | EC24 <sup>T</sup>        | VTDO00000000.1   | 72.14 | 20.60 | 72.18 | 20.60 |
| 59 | <i>A. rudis</i>          | CIP 110305 <sup>T</sup>  | ATGI00000000.1   | 72.98 | 21.40 | 73.14 | 21.20 |
| 60 | <i>A. schindleri</i>     | CIP 107287 <sup>T</sup>  | APPQ00000000.1   | 74.80 | 22.50 | 74.67 | 22.10 |
| 61 | <i>A. sedimenti</i>      | A3.8 <sup>T</sup>        | JAKUML00000000.1 | 73.05 | 23.20 | 73.07 | 24.10 |
| 62 | <i>A. seifertii</i>      | NIPH 973 <sup>T</sup>    | APOO00000000.1   | 75.80 | 20.60 | 75.88 | 20.40 |
| 63 | <i>A. shaoyimingii</i>   | 323-1 <sup>T</sup>       | CP049801.1       | 73.87 | 21.30 | 74.01 | 21.40 |
| 64 | <i>A. sichuanensis</i>   | WCHAc060041 <sup>T</sup> | PYIX00000000.2   | 74.26 | 21.20 | 74.37 | 21.30 |
| 65 | <i>A. silvestris</i>     | ANC 4999 <sup>T</sup>    | NEGB00000000.1   | 74.34 | 20.80 | 74.36 | 20.60 |
| 66 | <i>A. soli</i>           | CIP 110264 <sup>T</sup>  | APPU00000000.1   | 74.25 | 20.50 | 74.66 | 20.60 |
| 67 | <i>A. stercoris</i>      | KPC-SM-21 <sup>T</sup>   | OOGT00000000.1   | 74.02 | 21.10 | 74.24 | 20.90 |
| 68 | <i>A. tandoii</i>        | CIP 107469 <sup>T</sup>  | AQFM00000000.1   | 74.55 | 20.30 | 74.49 | 20.40 |
| 69 | <i>A. terrae</i>         | ANC 4282 <sup>T</sup>    | JABERI00000000.1 | 74.86 | 21.10 | 74.95 | 20.80 |
| 70 | <i>A. terrestris</i>     | ANC4471 <sup>T</sup>     | SJNZ00000000.1   | 74.68 | 20.40 | 74.64 | 20.20 |
| 71 | <i>A. tibetensis</i>     | Y-23 <sup>T</sup>        | ASM2382431v1     | 74.39 | 20.60 | 74.41 | 20.70 |
| 72 | <i>A. tjernbergiae</i>   | DSM 14971 <sup>T</sup>   | ARFU00000000.1   | 81.29 | 23.90 | 81.24 | 24.00 |
| 73 | <i>A. towneri</i>        | CIP 107472 <sup>T</sup>  | APPY00000000.1   | 74.83 | 21.50 | 75.05 | 21.60 |
| 74 | <i>A. ursingii</i>       | CIP 107286 <sup>T</sup>  | APQA00000000.1   | 75.67 | 22.20 | 75.72 | 21.30 |
| 75 | <i>A. variabilis</i>     | NIPH 2171 <sup>T</sup>   | APRS00000000.1   | 74.85 | 21.60 | 74.55 | 21.50 |
| 76 | <i>A. venetianus</i>     | CIP 110063 <sup>T</sup>  | APPO00000000.1   | 80.52 | 23.10 | 80.42 | 23.20 |
| 77 | <i>A. vivianii</i>       | NIPH 2168 <sup>T</sup>   | APRW00000000.1   | 81.52 | 24.40 | 81.51 | 24.30 |
| 78 | <i>A. wanghuiae</i>      | dk386 <sup>T</sup>       | CP045650.1       | 74.08 | 20.80 | 73.87 | 20.50 |
| 79 | <i>A. wuhouensis</i>     | WCHA60 <sup>T</sup>      | CP031716.1       | 74.47 | 21.60 | 74.41 | 21.70 |
